# Supplementary material for: A simple and efficient synthetic method for poly(ethylene terephthalate): phenylalkyl pyrrolidinium ionic liquid as polycondensation medium
Source: Royal Society of Chemistry journal article supplement (doi:10.1039/c2gc35310e), 2012-01-01
Supplement: c2gc35310e.pdf [file c2gc35310e.pdf]

## Electronic Supplementary Information

# A Simple and Efficient Synthetic Method for Poly(ethylene terephthalate): Phenylalkyl Pyrrolidinium Ionic Liquid as Polycondensation Medium

Junyan Dou and Zhengping Liu\*

Institute of Polymer Chemistry and Physics, College of Chemistry, BNU Key Lab of Environmentally Friendly and Functional Polymer Materials, Beijing Normal University, Beijing 100875, China

Fax: +86 10 58802075; E-mail: [lzp@bnu.edu.cn](mailto:lzp@bnu.edu.cn) (Z. Liu).

**(2a) 1-methyl-1-(3-methylbenzyl)pyrrolidinium bromide [3MBPy][Br]** Yield: 85.0 %;  $T_d$ : 230 °C; Found: C, 57.70 %, H, 6.826 %, N, 5.053 %; Calc. for  $C_{13}H_{20}NBr$  (270.04): C, 57.77 %, H, 7.41 %, N, 5.18 %;  $^1H$  NMR (400 MHz,  $D_2O$ ):  $\delta$  = 7.32-7.23 (br, 4H,  $C_6H_4$ ), 4.36 (s, 2H,  $NCH_2C_6H_4$ ), 3.55-3.48 (br, 2H,  $NCH_2CH_2CH_2CH_2$ ), 3.34-3.28 (br, 2H,  $NCH_2CH_2CH_2CH_2$ ), 2.85 (s, 3H,  $NCH_3$ ), 2.28 (s, 3H,  $C_6H_4CH_3$ ), 2.14-2.12 (br, 4H,  $NCH_2CH_2CH_2CH_2$ ) ppm; IR (KBr pellet): 3021 (m,  $\nu_{Ar-H}$ ), 2997 (m), 2965 (s,  $\nu_{C-H}$ ), 1607 (s), 1588 (s), 1459 (s), 1393 (s), 1164 (m,  $\nu_{C-N}$ ), 905 (s), 877 (s), 809 (s), 747 (s), 700 (s)  $cm^{-1}$ .

**(2b) 1-methyl-1-(3-methylbenzyl)pyrrolidinium bis(trifluoromethylsulfonyl)imide [3MBPy][Tf<sub>2</sub>N]** Yield: 90.0 %; Found: C, 38.18 %, H, 4.07 %, N, 5.91 %; Calc. for  $C_{15}H_{20}N_2S_2O_4F_6$  (470.08): C, 38.30 %, H, 4.28 %, N, 5.95 %;  $^1H$  NMR (400 MHz, d-DMSO):  $\delta$  = 7.40-7.34 (br, 4H,  $C_6H_4$ ), 4.49 (s, 2H,  $NCH_2Ph$ ), 3.53 (br, 2H,  $NCH_2CH_2CH_2CH_2$ ), 3.35 (br, 2H,  $NCH_2CH_2CH_2CH_2$ ), 2.88 (s, 3H,  $NCH_3$ ), 2.37 (s,

3H, PhCH<sub>3</sub>), 2.12 (br, 4H, NCH<sub>2</sub>CH<sub>2</sub>CH<sub>2</sub>CH<sub>2</sub>) ppm; IR (KBr pellet): 3058 (w), 2997 (w), 2923 (w), 1612 (m), 1465 (m), 1350 (s,  $\nu_{S=O}$ ), 1337 (s), 1212 (s), 1194 (s,  $\nu_{S=O}$ ), 1138 (s,  $\nu_{C-N}$ ), 1055 (s,  $\nu_{C-F}$ ), 938 (m), 902 (m), 800 (m), 762 (m), 739 (m), 618 (s) cm<sup>-1</sup>.

**(2c) 1-methyl-1-(3-methylbenzyl)pyrrolidinium hexafluorophosphate [3MBPy][PF<sub>6</sub>]** Yield: 84.2 %; Found: C, 46.71 %, H, 5.80 %, N, 4.07 %; Calc. for C<sub>13</sub>H<sub>20</sub>NPF<sub>6</sub> (334.89): C, 46.58 %, H, 5.97 %, N, 4.18 %; <sup>1</sup>H NMR (400 MHz, d-DMSO):  $\delta$  = 7.42-7.34 (m, 4H, C<sub>6</sub>H<sub>4</sub>), 4.49 (s, 2H, NCH<sub>2</sub>C<sub>6</sub>H<sub>4</sub>), 3.54 (m, 2H, NCH<sub>2</sub>CH<sub>2</sub>CH<sub>2</sub>CH<sub>2</sub>), 3.44 (m, 2H, NCH<sub>2</sub>CH<sub>2</sub>CH<sub>2</sub>CH<sub>2</sub>), 2.88 (s, 3H, NCH<sub>3</sub>), 2.37 (s, 3H, PhCH<sub>3</sub>), 2.12 (m, 4H, NCH<sub>2</sub>CH<sub>2</sub>CH<sub>2</sub>CH<sub>2</sub>) ppm; IR (KBr pellet): 3035 (w,  $\nu_{Ar-H}$ ), 2994 (w,  $\nu_{C-H}$ ), 1609 (m), 1468 (s), 1425 (m), 1400 (m), 1368 (m), 939 (m), 845 (s), 745 (m), 707 (m), 557 (s) cm<sup>-1</sup>.

**(3a) 1-methyl-1-(4-methylbenzyl)pyrrolidinium bromide [4MBPy][Br]** Yield: 88.0 %; T<sub>d</sub>: 240 °C; Found: C, 54.78 %, H, 7.46 %, N, 4.85 %; Calc. for C<sub>13</sub>H<sub>20</sub>NBr (269.08): C, 57.78 %, H, 7.46 %, N, 5.18 %; <sup>1</sup>H NMR (400 MHz, D<sub>2</sub>O):  $\delta$  = 7.34 (d, 2H, C<sub>6</sub>H<sub>2</sub>H<sub>2</sub>, J = 8.4 Hz), 7.27 (d, 2H, C<sub>6</sub>H<sub>2</sub>H<sub>2</sub>, J = 8.0 Hz), 4.37 (s, 2H, NCH<sub>2</sub>C<sub>6</sub>H<sub>4</sub>), 3.53-3.50 (br, 2H, NCH<sub>2</sub>CH<sub>2</sub>CH<sub>2</sub>CH<sub>2</sub>), 3.33-3.30 (br, 2H, NCH<sub>2</sub>CH<sub>2</sub>CH<sub>2</sub>CH<sub>2</sub>), 2.86 (s, 3H, NCH<sub>3</sub>), 2.29 (s, 3H, C<sub>6</sub>H<sub>4</sub>CH<sub>3</sub>), 2.14-2.13 (br, 4H, NCH<sub>2</sub>CH<sub>2</sub>CH<sub>2</sub>CH<sub>2</sub>) ppm; IR (KBr pellet): 3014 (m,  $\nu_{Ar-H}$ ), 2958 (m,  $\nu_{C-H}$ ), 2891 (m,  $\nu_{C-H}$ ), 1623 (s,  $\nu_{C-C}$ ), 1517 (s), 1456 (s), 1424 (s), 1404 (s), 1381 (m), 1118 (m,  $\nu_{C-N}$ ), 934 (s), 921 (s), 811 (s), 759 (m), 634 (s), 585 (s), 485 (s) cm<sup>-1</sup>.

**(3b) 1-methyl-1-(4-methylbenzyl)pyrrolidinium bis(trifluoromethylsulfonyl)-imide [4MBPy][Tf<sub>2</sub>N]** Yield: 74.0 %; Found: C, 38.26 %, H, 4.26 %, N, 5.74 %; Calc. for C<sub>15</sub>H<sub>20</sub>N<sub>2</sub>S<sub>2</sub>O<sub>4</sub>F<sub>6</sub> (470.08): C, 38.30 %, H, 4.28 %, N, 5.95 %; <sup>1</sup>H NMR (400 MHz, d-DMSO):  $\delta$  = 7.44-7.42 (d, 2H, C<sub>6</sub>H<sub>2</sub>H<sub>2</sub>, J = 8.0 Hz), 7.31-7.29 (d, 2H, C<sub>6</sub>H<sub>2</sub>H<sub>2</sub>, J = 8.0 Hz), 4.47 (s, 2H, NCH<sub>2</sub>Ph), 3.53-3.50 (br, 2H, NCH<sub>2</sub>CH<sub>2</sub>CH<sub>2</sub>CH<sub>2</sub>), 3.36-3.32 (br, 2H, NCH<sub>2</sub>CH<sub>2</sub>CH<sub>2</sub>CH<sub>2</sub>), 2.85 (s, 3H, NCH<sub>3</sub>), 2.34 (s, 3H, PhCH<sub>3</sub>), 2.10-2.09 (br, 4H, NCH<sub>2</sub>CH<sub>2</sub>CH<sub>2</sub>CH<sub>2</sub>) ppm; IR (NaCl): 3033 (m,  $\nu_{Ar-H}$ ), 2982 (m), 2927 (m,  $\nu_{C-H}$ ), 1615 (m), 1517 (m,  $\nu_{C-C}$ ), 1477 (m), 1464 (m), 1429 (w), 1352 (s,  $\nu_{S=O}$ ), 1197 (s,  $\nu_{S=O}$ ), 1138 (s), 1056 (s,  $\nu_{C-F}$ ), 930 (m), 816 (m), 789 (m), 761 (m), 740 (m), 654 (w), 617 (m),

570 (m)  $\text{cm}^{-1}$ .

**(3c) 1-methyl-1-(4-methylbenzyl)pyrrolidinium hexafluorophosphate [4MBPy][PF<sub>6</sub>]** Yield: 82.0 %; Found: C, 46.34 %, H, 5.77 %, N, 4.09 %; Calc. for C<sub>13</sub>H<sub>20</sub>NPF<sub>6</sub> (335.12): C, 46.57 %, H, 6.01 %, N, 4.18 %; <sup>1</sup>H NMR (400 MHz, d-DMSO):  $\delta$  = 7.44-7.42 (d, 2H, C<sub>6</sub>H<sub>2</sub>H<sub>2</sub>, *J* = 8.0 Hz), 7.31-7.29 (d, 2H, C<sub>6</sub>H<sub>2</sub>H<sub>2</sub>, *J* = 8.0 Hz), 4.47 (s, 2H, NCH<sub>2</sub>Ph), 3.53-3.50 (br, 2H, NCH<sub>2</sub>CH<sub>2</sub>CH<sub>2</sub>CH<sub>2</sub>), 3.36-3.34 (br, 2H, NCH<sub>2</sub>CH<sub>2</sub>CH<sub>2</sub>CH<sub>2</sub>), 2.85 (s, 3H, NCH<sub>3</sub>), 2.34 (s, 3H, PhCH<sub>3</sub>), 2.09-2.12 (br, 4H, NCH<sub>2</sub>CH<sub>2</sub>CH<sub>2</sub>CH<sub>2</sub>) ppm; IR (KBr pellet): 3058 (m,  $\nu_{\text{Ar-H}}$ ), 2984 (m), 2923 (m,  $\nu_{\text{C-H}}$ ), 1615 (m), 1519 (m,  $\nu_{\text{C-C}}$ ), 1480 (m), 1466 (m,  $\nu_{\text{C-H}}$ ), 1435 (m), 1395 (m), 833 (s,  $\nu_{\text{P-F}}$ ), 558 (s,  $\nu_{\text{C-H}}$ ), 487 (m)  $\text{cm}^{-1}$ .

**(4a) 1-(2-fluorobenzyl)-1-methylpyrrolidinium bromide [2FBPy][Br]** Yield: 95.2 %; *T<sub>d</sub>*: 220 °C; Found: C, 51.85 %, H, 6.76 %, N, 4.93 %; Calc. for C<sub>12</sub>H<sub>17</sub>BrFN (273.05): C, 52.57 %, H, 6.25 %, N, 5.11 %; <sup>1</sup>H NMR (400 MHz, D<sub>2</sub>O):  $\delta$  = 7.57-7.49 (m, 2H, C<sub>6</sub>H<sub>2</sub>H<sub>2</sub>), 7.30-7.23 (m, 2H, C<sub>6</sub>H<sub>2</sub>H<sub>2</sub>), 4.54 (s, 2H, NCH<sub>2</sub>C<sub>6</sub>H<sub>4</sub>), 3.61-3.55 (br, 2H, NCH<sub>2</sub>CH<sub>2</sub>CH<sub>2</sub>CH<sub>2</sub>), 3.45-3.40 (m, 2H, NCH<sub>2</sub>CH<sub>2</sub>CH<sub>2</sub>CH<sub>2</sub>), 2.94 (s, 3H, NCH<sub>3</sub>), 2.20-2.18 (br, 4H, NCH<sub>2</sub>CH<sub>2</sub>CH<sub>2</sub>CH<sub>2</sub>) ppm; IR (KBr pellet): 3008 (m,  $\nu_{\text{Ar-H}}$ ), 2966 (m,  $\nu_{\text{C-H}}$ ), 1616(s), 1585 (m,  $\nu_{\text{C-C}}$ ), 1494 (s), 1469 (m,  $\nu_{\text{C-H}}$ ), 1454 (m), 1223 (s,  $\nu_{\text{C-F}}$ ), 1191 (m,  $\nu_{\text{C-N}}$ ), 1110 (m), 933(m), 917 (m), 782 (s), 769 (s)  $\text{cm}^{-1}$ .

**(4b) 1-(2-fluorobenzyl)-1-methylpyrrolidinium bis(trifluoromethylsulfonyl)-imide [2FBPy][Tf<sub>2</sub>N]** Yield: 79.7 %; Found: C, 35.58 %, H, 3.93 %, N, 5.88 %; Calc. for C<sub>14</sub>H<sub>17</sub>F<sub>7</sub>N<sub>2</sub>O<sub>4</sub>S<sub>2</sub> (474.05): C, 35.44 %, H, 3.61 %, N, 5.90 %; <sup>1</sup>H NMR (400 MHz, d-DMSO):  $\delta$  = 7.64-7.58 (m, 2H, C<sub>6</sub>H<sub>2</sub>H<sub>2</sub>), 7.41-7.33 (m, 2H, C<sub>6</sub>H<sub>2</sub>H<sub>2</sub>), 4.61 (s, 2H, NCH<sub>2</sub>Ph), 3.52-3.44 (m, 4H, NCH<sub>2</sub>CH<sub>2</sub>CH<sub>2</sub>CH<sub>2</sub>), 2.91 (s, 3H, NCH<sub>3</sub>), 2.12-2.11 (br, 4H, NCH<sub>2</sub>CH<sub>2</sub>CH<sub>2</sub>CH<sub>2</sub>) ppm; IR (KBr): 3039 (w), 3018 (w,  $\nu_{\text{Ar-H}}$ ), 2991 (w), 2902 (w,  $\nu_{\text{C-H}}$ ), 1618 (m), 1589 (m,  $\nu_{\text{C-C}}$ ), 1495 (m), 1480 (m), 1463 (m,  $\nu_{\text{C-H}}$ ), 1356 (m,  $\nu_{\text{S=O}}$ ), 1189 (s,  $\nu_{\text{S=O}}$ ), 1140 (s,  $\nu_{\text{C-F}}$ ), 1057 (s), 933 (m), 916 (m), 765 (m), 740 (m), 618 (m), 569 (m), 514 (m)  $\text{cm}^{-1}$ .

**(4c) 1-(2-fluorobenzyl)-1-methylpyrrolidinium hexafluorophosphate [2FBPy][PF<sub>6</sub>]** Yield: 80.8 %; Found: C, 42.48 %, H, 5.09 %, N, 4.05 %; Calc. for C<sub>12</sub>H<sub>17</sub>F<sub>7</sub>NP (339.10): C, 42.49 %, H, 5.05 %, N, 4.13 %; <sup>1</sup>H NMR (400 MHz,

d-DMSO):  $\delta = 7.64-7.58$  (m, 2H,  $C_6H_2H_2$ ),  $7.41-7.33$  (m, 2H,  $C_6H_2H_2$ ), 4.61 (s, 2H,  $NCH_2Ph$ ), 3.52-3.43 (m, 4H,  $NCH_2CH_2CH_2CH_2$ ), 2.91 (s, 3H,  $NCH_3$ ), 2.12-2.11 (br, 4H,  $NCH_2CH_2CH_2CH_2$ ) ppm; IR (KBr pellet): 3079 (w), 3033 (w,  $\nu_{Ar-H}$ ), 2994 (w), 2914 (w,  $\nu_{C-H}$ ), 1618 (m), 1587 (m,  $\nu_{C-C}$ ), 1495 (m), 1480 (m), 1459 (m,  $\nu_{C-H}$ ), 1236 (m,  $\nu_{C-F}$ ), 1196 (m,  $\nu_{C-N}$ ), 1132 (m), 832 (s,  $\nu_{P-F}$ ), 557 (s)  $cm^{-1}$ .

**(5a) 1-(3-fluorobenzyl)-1-methylpyrrolidinium bromide [3FBPy][Br]** Yield: 93.4 %;  $T_d$ : 230 °C; Found: C, 51.64 %, H, 5.77 %, N, 4.95 %; Calc. for  $C_{12}H_{17}BrFN$  (273.05): C, 52.57 %, H, 6.25 %, N, 5.11 %;  $^1H$  NMR (400 MHz,  $D_2O$ ):  $\delta = 7.29-7.02$  (m, 4H,  $C_6H_4$ ), 4.24 (s, 2H,  $NCH_2C_6H_4$ ), 3.37-3.32 (br, 2H,  $NCH_2CH_2CH_2CH_2$ ), 3.21-3.15 (br, 2H,  $NCH_2CH_2CH_2CH_2$ ), 2.70 (s, 3H,  $NCH_3$ ), 1.97-1.95 (br, 4H,  $NCH_2CH_2CH_2CH_2$ ) ppm; IR (KBr pellet): 3028 (m), 3004 (m,  $\nu_{Ar-H}$ ), 2968 (s), 2890 (m,  $\nu_{C-H}$ ), 1616 (m), 1590 (s,  $\nu_{C-C}$ ), 1490 (s), 1454 (s,  $\nu_{C-H}$ ), 1259 (s), 1158 (m,  $\nu_{C-N}$ ), 1146 (m,  $\nu_{C-F}$ ), 900 (m), 876 (m), 804 (m), 759 (m), 696 (m), 521 (m), 452 (m)  $cm^{-1}$ .

**(5b) 1-(3-fluorobenzyl)-1-methylpyrrolidinium bis(trifluoromethylsulfonyl)imide [3FBPy][Tf<sub>2</sub>N]** Yield: 61.2 %; Found: C, 35.52 %, H, 3.68 %, N, 5.96 %; Calc. for  $C_{14}H_{17}F_7N_2O_4S_2$  (474.05): C, 35.44 %, H, 3.61 %, N, 5.90 %;  $^1H$  NMR (400 MHz, d-DMSO):  $\delta = 7.58-7.36$  (m, 4H,  $C_6H_4$ ), 4.54 (s, 2H,  $NCH_2Ph$ ), 3.56-3.53 (br, 2H,  $NCH_2CH_2CH_2CH_2$ ), 3.41-3.37 (br, 2H,  $NCH_2CH_2CH_2CH_2$ ), 2.88 (s, 3H,  $NCH_3$ ), 2.12-2.10 (br, 4H,  $NCH_2CH_2CH_2CH_2$ ) ppm; IR (KBr pellet): 3067 (w,  $\nu_{Ar-H}$ ), 2978 (w), 2914 (w), 2847 (w,  $\nu_{C-H}$ ), 1618 (w), 1593 (m,  $\nu_{C-C}$ ), 1492 (m), 1452 (m,  $\nu_{C-H}$ ), 1350 (m,  $\nu_{S=O}$ ), 1185 (s,  $\nu_{C-N}$ ), 1132 (s,  $\nu_{C-F}$ ), 1055 (s,  $\nu_{C-F}$ ), 876 (w), 791 (m), 739 (m), 698 (m)  $cm^{-1}$ .

**(5c) 1-(3-fluorobenzyl)-1-methylpyrrolidinium hexafluorophosphate [3FBPy][PF<sub>6</sub>]** Yield: 49.4 %; Found: C, 42.65 %, H, 5.29 %, N, 4.13 %; Calc. for  $C_{12}H_{17}F_7NP$  (339.10): C, 42.49 %, H, 5.05 %, N, 4.13 %;  $^1H$  NMR (400 MHz, d-DMSO):  $\delta = 7.58-7.36$  (m, 4H,  $C_6H_4$ ), 4.54 (s, 2H,  $NCH_2Ph$ ), 3.56-3.53 (br, 2H,  $NCH_2CH_2CH_2CH_2$ ), 3.41-3.37 (br, 2H,  $NCH_2CH_2CH_2CH_2$ ), 2.88 (s, 3H,  $NCH_3$ ), 2.12-2.10 (br, 4H,  $NCH_2CH_2CH_2CH_2$ ) ppm; IR (KBr pellet): 3097 (w), 3024 (w,  $\nu_{Ar-H}$ ), 2987 (w), 2917 (w), 2847 (w,  $\nu_{C-H}$ ), 1619 (m), 1594 (m,  $\nu_{C-C}$ ), 1492 (m), 1481 (m), 1467 (m), 1452 (m,  $\nu_{C-H}$ ), 1260 (m,  $\nu_{C-F}$ ), 1152 (m,  $\nu_{C-N}$ ), 834 (s,  $\nu_{P-F}$ ), 557 (s,

$\nu_{\text{C-H}}$ )  $\text{cm}^{-1}$ .

**(6a) 1-(4-fluorobenzyl)-1-methylpyrrolidinium bromide [4FBPy][Br]** Yield: 93.5 %;  $T_{\text{d}}$ : 240 °C; Found: C, 52.52 %, H, 5.87 %, N, 4.96 %; Calc. for  $\text{C}_{12}\text{H}_{17}\text{BrFN}$  (273.05): C, 52.57 %, H, 6.25 %, N, 5.11 %;  $^1\text{H}$  NMR (400 MHz,  $\text{D}_2\text{O}$ ):  $\delta$  = 7.28-7.25 (m, 2H,  $\text{C}_6\text{H}_2\text{H}_2$ ), 6.98-6.93 (m, 2H,  $\text{C}_6\text{H}_2\text{H}_2$ ), 4.19 (s, 2H,  $\text{NCH}_2\text{C}_6\text{H}_4$ ), 3.36-3.27 (br, 2H,  $\text{NCH}_2\text{CH}_2\text{CH}_2\text{CH}_2$ ), 3.15-3.09 (br, 2H,  $\text{NCH}_2\text{CH}_2\text{CH}_2\text{CH}_2$ ), 2.65 (s, 3H,  $\text{NCH}_3$ ), 1.93-1.92 (br, 4H,  $\text{NCH}_2\text{CH}_2\text{CH}_2\text{CH}_2$ ) ppm; IR (KBr pellet): 3064 (w), 3001 (m,  $\nu_{\text{Ar-H}}$ ), 2972 (m), 2893 (m,  $\nu_{\text{C-H}}$ ), 1605 (s), 1510 (s,  $\nu_{\text{C-C}}$ ), 1223 (s,  $\nu_{\text{C-F}}$ ), 1169 (s,  $\nu_{\text{C-N}}$ ), 1018 (s), 828 (s), 781 (m), 615 (m), 538 (m), 505 (m), 424 (m)  $\text{cm}^{-1}$ .

**(6b) 1-(4-fluorobenzyl)-1-methylpyrrolidinium bis(trifluoromethylsulfonyl)imide [4FBPy][Tf<sub>2</sub>N]** Yield: 86.0 %; Found: C, 35.43 %, H, 3.72 %, N, 5.98 %; Calc. for  $\text{C}_{14}\text{H}_{17}\text{F}_7\text{N}_2\text{O}_4\text{S}_2$  (474.05): C, 35.44 %, H, 3.61 %, N, 5.90 %;  $^1\text{H}$  NMR (400 MHz, d-DMSO):  $\delta$  = 7.63-7.60 (m, 2H,  $\text{C}_6\text{H}_2\text{H}_2$ ), 7.36-7.31 (m, 2H,  $\text{C}_6\text{H}_2\text{H}_2$ ), 4.53 (s, 2H,  $\text{NCH}_2\text{Ph}$ ), 3.54-3.51 (br, 2H,  $\text{NCH}_2\text{CH}_2\text{CH}_2\text{CH}_2$ ), 3.38-3.34 (br, 2H,  $\text{NCH}_2\text{CH}_2\text{CH}_2\text{CH}_2$ ), 2.86 (s, 3H,  $\text{NCH}_3$ ), 2.11-2.10 (br, 4H,  $\text{NCH}_2\text{CH}_2\text{CH}_2\text{CH}_2$ ) ppm; IR (NaCl): 3125 (w), 3079 (w), 3045 (w,  $\nu_{\text{Ar-H}}$ ), 2982 (w), 2899 (w,  $\nu_{\text{C-H}}$ ), 1609 (m), 1515 (s,  $\nu_{\text{C-C}}$ ), 1477 (m), 1465 (m,  $\nu_{\text{C-H}}$ ), 1352 (s,  $\nu_{\text{S=O}}$ ), 1196 (s,  $\nu_{\text{C-N}}$ ), 1138 (s,  $\nu_{\text{Ar-F}}$ ), 1056 (s,  $\nu_{\text{C-F}}$ ), 842 (m), 789 (m), 653 (w)  $\text{cm}^{-1}$ .

**(6c) 1-(4-fluorobenzyl)-1-methylpyrrolidinium hexafluorophosphate [4FBPy][PF<sub>6</sub>]** Yield: 67.5 %; Found: C, 42.55 %, H, 5.36 %, N, 4.08 %; Calc. for  $\text{C}_{12}\text{H}_{17}\text{F}_7\text{NP}$  (339.10): C, 42.49 %, H, 5.05 %, N, 4.13 %;  $^1\text{H}$  NMR (400 MHz, d-DMSO):  $\delta$  = 7.63-7.59 (m, 2H,  $\text{C}_6\text{H}_2\text{H}_2$ ), 7.36-7.32 (m, 2H,  $\text{C}_6\text{H}_2\text{H}_2$ ), 4.52 (s, 2H,  $\text{NCH}_2\text{Ph}$ ), 3.51 (br, 2H,  $\text{NCH}_2\text{CH}_2\text{CH}_2\text{CH}_2$ ), 3.37-3.34 (br, 2H,  $\text{NCH}_2\text{CH}_2\text{CH}_2\text{CH}_2$ ), 2.86 (s, 3H,  $\text{NCH}_3$ ), 2.11-2.10 (br, 4H,  $\text{NCH}_2\text{CH}_2\text{CH}_2\text{CH}_2$ ) ppm; IR (KBr pellet): 3125 (w), 3089 (w), 3030 (w,  $\nu_{\text{Ar-H}}$ ), 2984 (w), 2899 (w,  $\nu_{\text{C-H}}$ ), 1608 (m), 1516 (m,  $\nu_{\text{C-C}}$ ), 1467 (m,  $\nu_{\text{C-H}}$ ), 1232 (m,  $\nu_{\text{C-F}}$ ), 1169 (m,  $\nu_{\text{C-N}}$ ), 839 (s,  $\nu_{\text{P-F}}$ ), 557 (s)  $\text{cm}^{-1}$ .

**(7a) 1-methyl-1-(2-nitrobenzyl)pyrrolidinium bromide [2NBPy][Br]** Yield: 97.8 %;  $T_{\text{d}}$ : 200 °C; Found: C, 46.01 %, H, 6.23 %, N, 8.87 %; Calc. for  $\text{C}_{12}\text{H}_{17}\text{BrN}_2\text{O}_2$  (300.05): C, 47.85 %, H, 5.69 %, N, 9.30 %;  $^1\text{H}$  NMR (400 MHz,  $\text{D}_2\text{O}$ ):  $\delta$  = 8.16-8.14 (m, 1H,  $\text{C}_6\text{H}_3\text{H}$ ), 7.78-7.68 (m, 3H,  $\text{C}_6\text{H}_3\text{H}$ ), 4.94 (s, 2H,

NCH<sub>2</sub>Ph), 3.49-3.47 (br, 4H, NCH<sub>2</sub>CH<sub>2</sub>CH<sub>2</sub>CH<sub>2</sub>), 2.90 (s, 3H, NCH<sub>3</sub>), 2.15-2.13 (br, 4H, NCH<sub>2</sub>CH<sub>2</sub>CH<sub>2</sub>CH<sub>2</sub>) ppm; IR (KBr pellet): 3032 (m), 3015 (m,  $\nu_{\text{Ar-H}}$ ), 1605 (m), 1575 (m,  $\nu_{\text{C-C}}$ ), 1527 (s,  $\nu_{\text{N=O}}$ ), 1480 (m,  $\nu_{\text{C-H}}$ ), 1457 (m), 1348 (s,  $\nu_{\text{N=O}}$ ), 1007 (m,  $\nu_{\text{C-N}}$ ), 935 (m), 915 (m), 860 (m), 792 (m), 753 (m), 711 (m) cm<sup>-1</sup>.

**(7b) 1-methyl-1-(2-nitrobenzyl)pyrrolidinium bis(trifluoromethylsulfonyl)-imide [2NBPy][Tf<sub>2</sub>N]** Yield: 86.5 %; Found: C, 33.66 %, H, 3.37 %, N, 8.33 %; Calc. for C<sub>14</sub>H<sub>17</sub>F<sub>6</sub>N<sub>3</sub>O<sub>6</sub>S<sub>2</sub> (501.05): C, 33.53 %, H, 3.42 %, N, 8.38 %; <sup>1</sup>H NMR (400 MHz, d-DMSO):  $\delta$  = 8.16-8.14 (d, 1H, C<sub>6</sub>H<sub>3</sub>H,  $J$  = 8.1 Hz), 7.88-7.82 (m, 3H, C<sub>6</sub>HH<sub>3</sub>), 4.93 (s, 2H, NCH<sub>2</sub>Ph), 3.50 (br, 4H, NCH<sub>2</sub>CH<sub>2</sub>CH<sub>2</sub>CH<sub>2</sub>), 2.85 (s, 3H, NCH<sub>3</sub>), 2.09 (br, 4H, NCH<sub>2</sub>CH<sub>2</sub>CH<sub>2</sub>CH<sub>2</sub>) ppm; IR (KBr pellet): 3119 (w), 3064 (w), 3034 (w,  $\nu_{\text{Ar-H}}$ ), 2981 (w), 2923 (w,  $\nu_{\text{C-H}}$ ), 1610 (w), 1580 (w,  $\nu_{\text{C-C}}$ ), 1537 (s,  $\nu_{\text{N=O}}$ ), 1477 (m), 1455 (m,  $\nu_{\text{C-H}}$ ), 1357 (s,  $\nu_{\text{S=O}}$ ), 1204 (s,  $\nu_{\text{C-N}}$ ), 1142 (s,  $\nu_{\text{Ar-F}}$ ), 1059 (s,  $\nu_{\text{C-F}}$ ), 929 (m), 907 (m), 861 (m), 833 (m), 798 (m), 762 (m), 741 (m), 705 (m), 622 (s), 611 (s), 569 (s), 514 (s) cm<sup>-1</sup>.

**(7c) 1-methyl-1-(2-nitrobenzyl)pyrrolidinium hexafluorophosphate [2NBPy][PF<sub>6</sub>]** Yield: 85.8 %; Found: C, 39.45 %, H, 4.61 %, N, 7.60 %; Calc. for C<sub>12</sub>H<sub>17</sub>F<sub>6</sub>N<sub>2</sub>O<sub>2</sub>P (366.09): C, 39.35 %, H, 4.68 %, N, 7.65 %; <sup>1</sup>H NMR (400 MHz, d-DMSO):  $\delta$  = 8.16-8.14 (d, 1H, C<sub>6</sub>H<sub>3</sub>H,  $J$  = 7.8 Hz), 7.88-7.80 (m, 3H, C<sub>6</sub>HH<sub>3</sub>), 4.93 (s, 2H, NCH<sub>2</sub>Ph), 3.50 (br, 4H, NCH<sub>2</sub>CH<sub>2</sub>CH<sub>2</sub>CH<sub>2</sub>), 2.85 (s, 3H, NCH<sub>3</sub>), 2.09-2.08 (br, 4H, NCH<sub>2</sub>CH<sub>2</sub>CH<sub>2</sub>CH<sub>2</sub>) ppm; IR (KBr pellet): 3122 (w), 3097 (w), 3070 (w,  $\nu_{\text{Ar-H}}$ ), 2978 (w), 2923 (w), 2863 (w,  $\nu_{\text{C-H}}$ ), 1610 (m), 1576 (m,  $\nu_{\text{C-C}}$ ), 1540 (s,  $\nu_{\text{N=O}}$ ), 1478 (m,  $\nu_{\text{C-H}}$ ), 1453 (s), 1349 (s,  $\nu_{\text{N=O}}$ ), 837 (s,  $\nu_{\text{P-F}}$ ), 702 (m), 558 (s) cm<sup>-1</sup>.

**(8a) 1-methyl-1-(3-nitrobenzyl)pyrrolidinium bromide [3NBPy][Br]** Yield: 92.8 %;  $T_{\text{d}}$ : 240 °C; Found: C, 47.13 %, H, 5.86 %, N, 9.06 %; Calc. for C<sub>12</sub>H<sub>17</sub>BrN<sub>2</sub>O<sub>2</sub> (300.05): C, 47.85 %, H, 5.69 %, N, 9.30 %; <sup>1</sup>H NMR (400 MHz, D<sub>2</sub>O):  $\delta$  = 8.36-8.33 (m, 2H, C<sub>6</sub>H<sub>2</sub>H<sub>2</sub>), 7.89-7.87 (d, 1H, C<sub>6</sub>H<sub>3</sub>H,  $J$  = 8.0 Hz), 7.71-7.67 (t, 1H, C<sub>6</sub>H<sub>3</sub>H,  $J$  = 8.0 Hz), 4.58 (s, 2H, NCH<sub>2</sub>Ph), 3.59-3.57 (br, 2H, NCH<sub>2</sub>CH<sub>2</sub>CH<sub>2</sub>CH<sub>2</sub>), 3.43-3.39 (br, 2H, NCH<sub>2</sub>CH<sub>2</sub>CH<sub>2</sub>CH<sub>2</sub>), 2.91 (s, 3H, NCH<sub>3</sub>), 2.21-2.15 (br, 4H, NCH<sub>2</sub>CH<sub>2</sub>CH<sub>2</sub>CH<sub>2</sub>) ppm; IR (KBr pellet): 3069 (m), 3003 (m,  $\nu_{\text{Ar-H}}$ ), 2960 (m), 2892 (m,  $\nu_{\text{C-H}}$ ), 1532 (s,  $\nu_{\text{N=O}}$ ), 1474 (m,  $\nu_{\text{C-H}}$ ), 1459 (m), 1351 (s,  $\nu_{\text{N=O}}$ ), 1090 (m,  $\nu_{\text{C-N}}$ ), 878 (m), 902 (m), 819 (m), 808 (m), 747 (m), 723 (m), 699 (m),

675 (m)  $\text{cm}^{-1}$ .

**(8b) 1-methyl-1-(3-nitrobenzyl)pyrrolidinium bis(trifluoromethylsulfonyl)-imide [3NBPy][Tf<sub>2</sub>N]** Yield: 84.8 %; Found: C, 33.76 %, H, 3.54 %, N, 8.40 %; Calc. for C<sub>14</sub>H<sub>17</sub>F<sub>6</sub>N<sub>3</sub>O<sub>6</sub>S<sub>2</sub> (501.05): C, 33.53 %, H, 3.42 %, N, 8.38 %; <sup>1</sup>H NMR (400 MHz, d-DMSO):  $\delta$  = 8.48 (s, 1H, C<sub>6</sub>H<sub>3</sub>H), 8.40-8.38 (d, 1H, C<sub>6</sub>H<sub>3</sub>H, *J* = 8.0 Hz), 8.03-8.01 (d, 1H, C<sub>6</sub>H<sub>3</sub>H, *J* = 7.5 Hz), 7.83-7.79 (t, 1H, C<sub>6</sub>H<sub>3</sub>H, *J* = 7.9 Hz), 4.72 (s, 2H, NCH<sub>2</sub>Ph), 3.59-3.57 (br, 2H, NCH<sub>2</sub>CH<sub>2</sub>CH<sub>2</sub>CH<sub>2</sub>), 3.44-3.40 (br, 2H, NCH<sub>2</sub>CH<sub>2</sub>CH<sub>2</sub>CH<sub>2</sub>), 2.92 (s, 3H, NCH<sub>3</sub>), 2.14-2.13 (br, 4H, NCH<sub>2</sub>CH<sub>2</sub>CH<sub>2</sub>CH<sub>2</sub>) ppm; IR (KBr pellet): 3097 (w), 3080 (w), 3045 (w,  $\nu_{\text{Ar-H}}$ ), 2996 (w), 2899 (w,  $\nu_{\text{C-H}}$ ), 1619 (w), 1544 (s,  $\nu_{\text{N=O}}$ ), 1480 (m), 1464 (m,  $\nu_{\text{C-H}}$ ), 1358 (s,  $\nu_{\text{S=O}}$ ), 1198 (s,  $\nu_{\text{C-N}}$ ), 1139 (s,  $\nu_{\text{Ar-F}}$ ), 1049 (s,  $\nu_{\text{C-F}}$ ), 810 (m), 791 (m), 741 (m), 703 (m), 675 (m), 615 (s), 570 (s), 514 (s)  $\text{cm}^{-1}$ .

**(8c) 1-methyl-1-(3-nitrobenzyl)pyrrolidinium hexafluorophosphate [3NBPy][PF<sub>6</sub>]** Yield: 85.3 %; Found: C, 39.51 %, H, 4.53 %, N, 7.51 %; Calc. for C<sub>12</sub>H<sub>17</sub>F<sub>6</sub>N<sub>2</sub>O<sub>2</sub>P (366.09): C, 39.35 %, H, 4.68 %, N, 7.65 %; <sup>1</sup>H NMR (400 MHz, d-DMSO):  $\delta$  = 8.48 (s, 1H, C<sub>6</sub>H<sub>3</sub>H), 8.40-8.38 (d, 1H, C<sub>6</sub>H<sub>3</sub>H, *J* = 8.4 Hz), 8.03-8.01 (d, 1H, C<sub>6</sub>H<sub>3</sub>H, *J* = 7.5 Hz), 7.83-7.79 (t, 1H, C<sub>6</sub>H<sub>3</sub>H, *J* = 8.0 Hz), 4.72 (s, 2H, NCH<sub>2</sub>Ph), 3.60-3.57 (br, 2H, NCH<sub>2</sub>CH<sub>2</sub>CH<sub>2</sub>CH<sub>2</sub>), 3.44-3.41 (m, 2H, NCH<sub>2</sub>CH<sub>2</sub>CH<sub>2</sub>CH<sub>2</sub>), 2.92 (s, 3H, NCH<sub>3</sub>), 2.14-2.13 (br, 4H, NCH<sub>2</sub>CH<sub>2</sub>CH<sub>2</sub>CH<sub>2</sub>) ppm; IR (KBr pellet): 3102 (w), 3085 (w), 3045 (w), 3021 (w,  $\nu_{\text{Ar-H}}$ ), 2986 (w), 2902 (w,  $\nu_{\text{C-H}}$ ), 1620 (m), 1584 (w,  $\nu_{\text{C-C}}$ ), 1536 (s,  $\nu_{\text{N=O}}$ ), 1479 (s), 1453 (m), 1433 (m), 1398 (m,  $\nu_{\text{C-H}}$ ), 1348 (s,  $\nu_{\text{N=O}}$ ), 1094 (m,  $\nu_{\text{C-N}}$ ), 831 (s,  $\nu_{\text{P-F}}$ ), 746 (m), 699 (m), 674 (m), 557 (s)  $\text{cm}^{-1}$ .

**(9a) 1-methyl-1-(4-nitrobenzyl)pyrrolidinium bromide [4NBPy][Br]** Yield: 94.7 %; *T*<sub>d</sub>: 240 °C; Found: C, 48.43 %, H, 5.65 %, N, 9.26 %; Calc. for C<sub>12</sub>H<sub>17</sub>BrN<sub>2</sub>O<sub>2</sub> (300.05): C, 47.85 %, H, 5.69 %, N, 9.30 %; <sup>1</sup>H NMR (400 MHz, D<sub>2</sub>O):  $\delta$  = 8.31-8.29 (d, 2H, C<sub>6</sub>H<sub>2</sub>H<sub>2</sub>, *J* = 8.5 Hz), 7.76-7.73 (d, 2H, C<sub>6</sub>H<sub>2</sub>H<sub>2</sub>, *J* = 8.5 Hz), 4.60 (s, 2H, NCH<sub>2</sub>Ph), 3.62-3.59 (br, 2H, NCH<sub>2</sub>CH<sub>2</sub>CH<sub>2</sub>CH<sub>2</sub>), 3.47-3.42 (br, 2H, NCH<sub>2</sub>CH<sub>2</sub>CH<sub>2</sub>CH<sub>2</sub>), 2.94 (s, 3H, NCH<sub>3</sub>), 2.23-2.18 (br, 4H, NCH<sub>2</sub>CH<sub>2</sub>CH<sub>2</sub>CH<sub>2</sub>) ppm; IR (KBr pellet): 3038 (m), 3007 (m,  $\nu_{\text{Ar-H}}$ ), 2963 (m), 2886 (m,  $\nu_{\text{C-H}}$ ), 1605 (s,  $\nu_{\text{C-C}}$ ),

1527 (s,  $\nu_{\text{N=O}}$ ), 1461 (m,  $\nu_{\text{C-H}}$ ), 1346 (s,  $\nu_{\text{N=O}}$ ), 1105 (m), 1076 (m), 1013 (m,  $\nu_{\text{C-N}}$ ), 881 (m), 857 (m), 838 (m), 722 (m), 703 (m)  $\text{cm}^{-1}$ .

**(9b) 1-methyl-1-(4-nitrobenzyl)pyrrolidinium bis(trifluoromethylsulfonyl)-imide [4NBPY][Tf<sub>2</sub>N]** Yield: 76.0 %; Found: C, 33.79 %, H, 3.86 %, N, 8.37 %; Calc. for C<sub>14</sub>H<sub>17</sub>F<sub>6</sub>N<sub>3</sub>O<sub>6</sub>S<sub>2</sub> (501.05): C, 33.53 %, H, 3.42 %, N, 8.38 %; <sup>1</sup>H NMR (400 MHz, d-DMSO):  $\delta$  = 8.34-8.32 (d, 2H, C<sub>6</sub>H<sub>2</sub>H<sub>2</sub>,  $J$  = 8.0 Hz), 7.86-7.84 (m, 2H, C<sub>6</sub>H<sub>2</sub>H<sub>2</sub>,  $J$  = 8.4 Hz), 4.69 (s, 2H, NCH<sub>2</sub>Ph), 3.59-3.56 (br, 2H, NCH<sub>2</sub>CH<sub>2</sub>CH<sub>2</sub>CH<sub>2</sub>), 3.44-3.40 (br, 2H, NCH<sub>2</sub>CH<sub>2</sub>CH<sub>2</sub>CH<sub>2</sub>), 2.90 (s, 3H, NCH<sub>3</sub>), 2.13-2.12 (br, 4H, NCH<sub>2</sub>CH<sub>2</sub>CH<sub>2</sub>CH<sub>2</sub>) ppm; IR (NaCl): 3119 (w), 3085 (w,  $\nu_{\text{Ar-H}}$ ), 2983 (w,  $\nu_{\text{C-H}}$ ), 1610 (m,  $\nu_{\text{C-C}}$ ), 1529 (s,  $\nu_{\text{N=O}}$ ), 1477 (m), 1464 (m,  $\nu_{\text{C-H}}$ ), 1352 (s,  $\nu_{\text{S=O}}$ ), 1194 (s,  $\nu_{\text{C-N}}$ ), 1138 (s,  $\nu_{\text{Ar-F}}$ ), 1056 (s,  $\nu_{\text{C-F}}$ ), 856 (m), 830 (w), 789 (m), 704 (w), 653 (w)  $\text{cm}^{-1}$ .

**(9c) 1-methyl-1-(4-nitrobenzyl)pyrrolidinium hexafluorophosphate [4NBPY][PF<sub>6</sub>]** Yield: 80.6 %; Found: C, 39.47 %, H, 4.48 %, N, 7.60 %; Calc. for C<sub>12</sub>H<sub>17</sub>F<sub>6</sub>N<sub>2</sub>O<sub>2</sub>P (366.09): C, 39.35 %, H, 4.68 %, N, 7.65 %; <sup>1</sup>H NMR (400 MHz, d-DMSO):  $\delta$  = 8.18-8.16 (d, 2H, C<sub>6</sub>H<sub>2</sub>H<sub>2</sub>,  $J$  = 8.4 Hz), 7.69-7.67 (d, 2H, C<sub>6</sub>H<sub>2</sub>H<sub>2</sub>,  $J$  = 8.4 Hz), 4.52 (s, 2H, NCH<sub>2</sub>Ph), 3.41-3.39 (br, 2H, NCH<sub>2</sub>CH<sub>2</sub>CH<sub>2</sub>CH<sub>2</sub>), 3.27-3.23 (br, 2H, NCH<sub>2</sub>CH<sub>2</sub>CH<sub>2</sub>CH<sub>2</sub>), 2.73 (s, 3H, NCH<sub>3</sub>), 1.96-1.94 (br, 4H, NCH<sub>2</sub>CH<sub>2</sub>CH<sub>2</sub>CH<sub>2</sub>) ppm; IR (KBr pellet): 3119 (m), 3080 (m), 3024 (m,  $\nu_{\text{Ar-H}}$ ), 2987 (m), 2957 (m), 2908 (w), 2866 (m,  $\nu_{\text{C-H}}$ ), 1601 (s,  $\nu_{\text{C-C}}$ ), 1530 (s,  $\nu_{\text{N=O}}$ ), 1479 (s), 1467 (s,  $\nu_{\text{C-H}}$ ), 1358 (s,  $\nu_{\text{N=O}}$ ), 1212 (s), 1192 (m,  $\nu_{\text{C-N}}$ ), 848 (s,  $\nu_{\text{P-F}}$ ), 557 (s)  $\text{cm}^{-1}$ .

**(10a) 1-methyl-1-(2-phenethyl)pyrrolidinium bromide [PhEPY][Br]** Pale yellow solid with easily hygroscopic.  $T_d$ : 260 °C; Found: C, 54.94 %, H, 6.54 %, N, 5.39 %; Calc. for C<sub>13</sub>H<sub>20</sub>BrN (269.08): C, 57.78 %, H, 7.46 %, N, 5.18 %; <sup>1</sup>H NMR (400 MHz, D<sub>2</sub>O):  $\delta$  = 7.39-7.37 (m, 2H, C<sub>6</sub>H<sub>3</sub>H<sub>2</sub>), 7.33-7.32 (m, 3H, C<sub>6</sub>H<sub>2</sub>H<sub>3</sub>), 3.58-3.55 (t, 2H, NCH<sub>2</sub>CH<sub>2</sub>Ph,  $J$  = 8.1 Hz), 3.54-3.52 (m, 4H, NCH<sub>2</sub>CH<sub>2</sub>CH<sub>2</sub>CH<sub>2</sub>), 3.16-3.12 (t, 2H, CH<sub>2</sub>Ph,  $J$  = 8.8 Hz), 3.10 (s, 3H, NCH<sub>3</sub>), 2.19 (br, 4H, NCH<sub>2</sub>CH<sub>2</sub>CH<sub>2</sub>CH<sub>2</sub>) ppm; IR (KBr pellet): 3058 (m), 3021 (m), 3000 (m,  $\nu_{\text{Ar-H}}$ ), 2969 (m), 2954 (m), 2887 (m,  $\nu_{\text{C-H}}$ ), 1601 (m), 1583 (w,  $\nu_{\text{C-C}}$ ), 1456 (s,  $\nu_{\text{C-H}}$ ), 1181 (w,  $\nu_{\text{C-N}}$ ), 1088 (m), 1045 (m), 1015 (m), 993 (m), 966 (m), 932 (s), 759 (s), 702 (s), 552 (m), 509 (s)  $\text{cm}^{-1}$ .

**(10b) 1-methyl-1-(2-phenethyl)pyrrolidinium bis(trifluoromethylsulfonyl)-**



**imide [PhEPy][Tf<sub>2</sub>N]** Yield: 81.7 %; Found: C, 38.34 %, H, 4.10 %, N, 5.92 %; Calc. for C<sub>15</sub>H<sub>20</sub>F<sub>6</sub>N<sub>2</sub>O<sub>4</sub>S<sub>2</sub> (470.08): C, 38.30 %, H, 4.28 %, N, 5.95 %; <sup>1</sup>H NMR (400 MHz, d-DMSO): δ = 7.34-7.26 (m, 5H, C<sub>6</sub>H<sub>5</sub>), 3.55 (m, 2H, NCH<sub>2</sub>CH<sub>2</sub>Ph), 3.51 (br, 4H, NCH<sub>2</sub>CH<sub>2</sub>CH<sub>2</sub>CH<sub>2</sub>), 3.08 (s, 3H, NCH<sub>3</sub>), 3.05-3.03 (m, 2H, CH<sub>2</sub>Ph), 2.10 (br, 4H, NCH<sub>2</sub>CH<sub>2</sub>CH<sub>2</sub>CH<sub>2</sub>) ppm; IR (KBr pellet): 3094 (w), 3070 (w), 3039 (w, ν<sub>Ar-H</sub>), 2980 (w), 2939 (w), 2896 (w, ν<sub>C-H</sub>), 1605 (m), 1529 (s, ν<sub>C-C</sub>), 1464 (m), 1436 (m), 1344 (s, ν<sub>S=O</sub>), 1185 (s, ν<sub>C-N</sub>), 1136 (s, ν<sub>Ar-F</sub>), 1061 (s, ν<sub>C-F</sub>), 788 (m), 739 (m), 700 (m), 653 (m), 599 (s), 570 (s), 507 (s) cm<sup>-1</sup>.

**(10c) 1-methyl-1-(2-phenethyl)pyrrolidinium hexafluorophosphate [PhEPy][PF<sub>6</sub>]** Yield: 61.9 %; Found: C, 46.74 %, H, 5.70 %, N, 3.81 %; Calc. for C<sub>13</sub>H<sub>20</sub>F<sub>6</sub>NP (335.12): C, 46.57 %, H, 6.01 %, N, 4.18 %; <sup>1</sup>H NMR (400 MHz, d-DMSO): δ = 7.13-7.02 (m, 5H, C<sub>6</sub>H<sub>5</sub>), 3.31 (m, 2H, NCH<sub>2</sub>CH<sub>2</sub>Ph), 3.27 (br, 4H, NCH<sub>2</sub>CH<sub>2</sub>CH<sub>2</sub>CH<sub>2</sub>), 2.84 (s, 3H, NCH<sub>3</sub>), 2.82-2.80 (m, 2H, CH<sub>2</sub>Ph), 1.86 (br, 4H, NCH<sub>2</sub>CH<sub>2</sub>CH<sub>2</sub>CH<sub>2</sub>) ppm; IR (KBr pellet): 3076 (w), 3033 (w, ν<sub>Ar-H</sub>), 2983 (w), 2941 (w, ν<sub>C-H</sub>), 1605 (w, ν<sub>C-C</sub>), 1468 (m), 1431 (w, ν<sub>C-H</sub>), 1403 (w), 837 (s, ν<sub>P-F</sub>), 755 (m), 701 (m), 557 (s) cm<sup>-1</sup>.

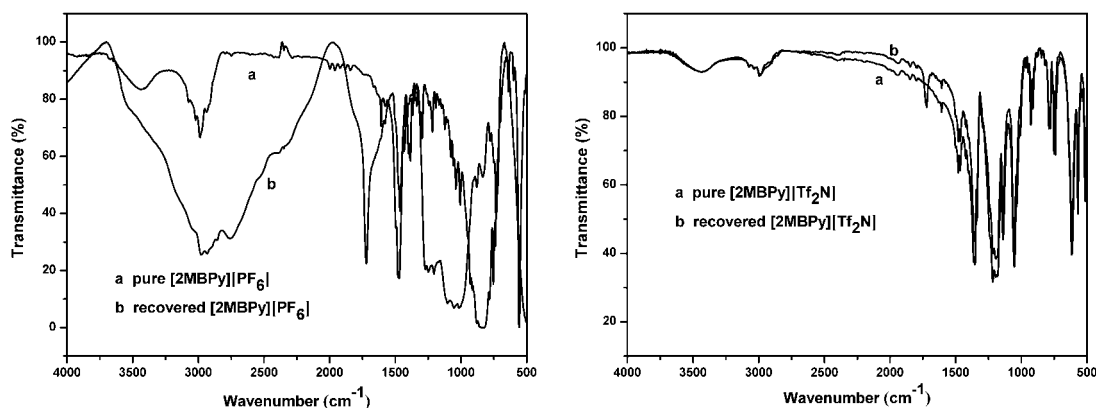

**Fig. S1.** The FTIR spectra of the pure ILs (a) and the recovered ILs (b).

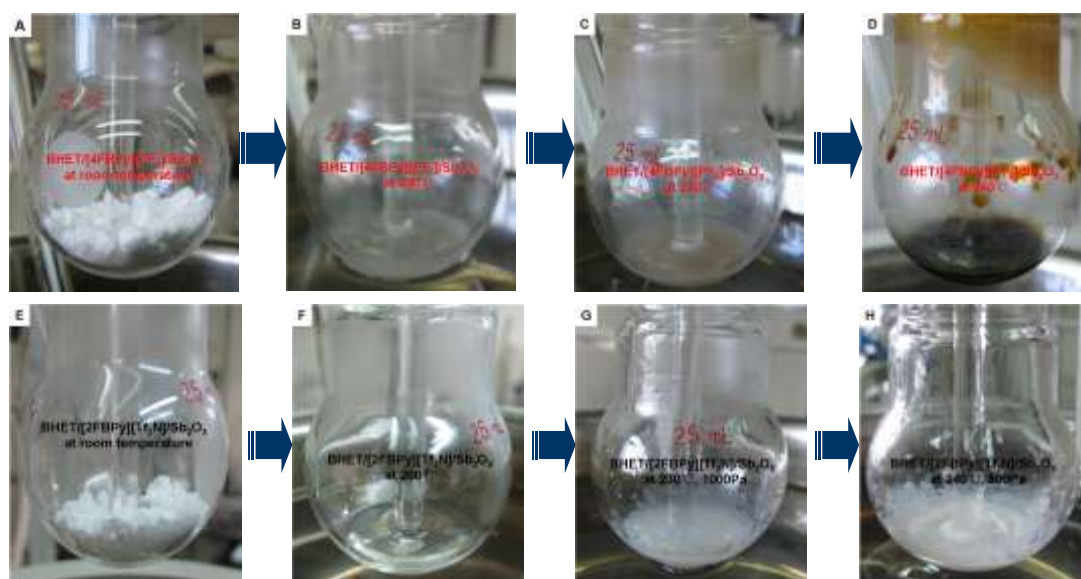

**Fig. S2.** Photographs of the polycondensation of BHET in [4FBPy][PF<sub>6</sub>] (A-D) and [2FBPy][Tf<sub>2</sub>N] (E-H) using Sb<sub>2</sub>O<sub>3</sub> as catalyst.

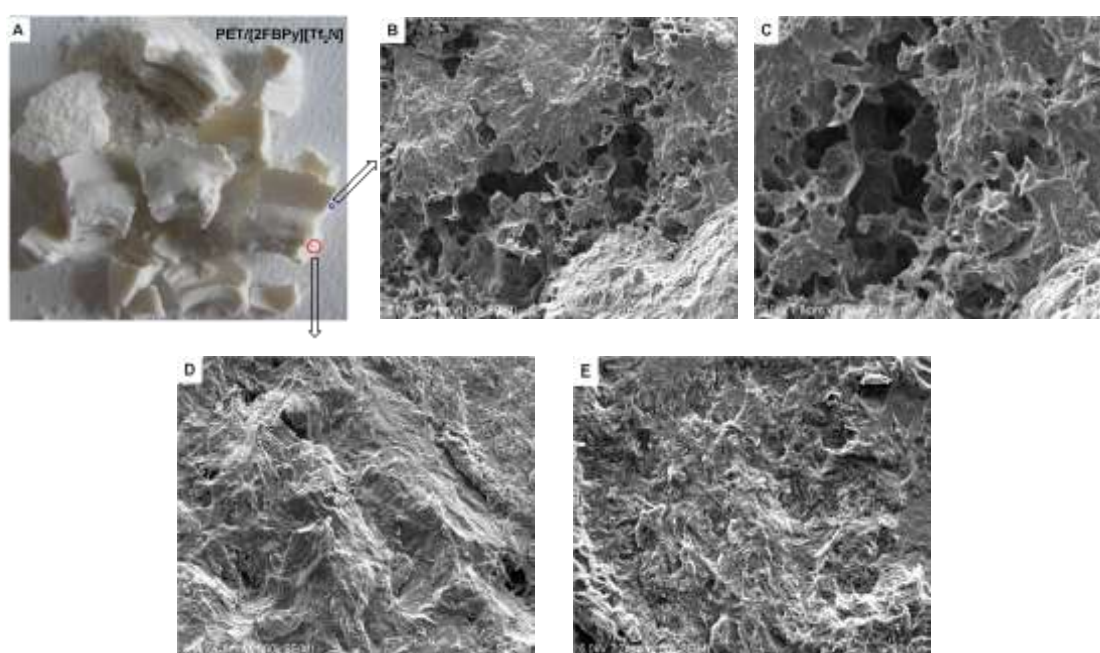

**Fig. S3.** SEM images of the fractured surface of PET/[2FBPy][Tf<sub>2</sub>N] at different area: at edge (B, C) and center (D, E). PET/[2FBPy][Tf<sub>2</sub>N] prepared by polycondensation of BHET in [2FBPy][Tf<sub>2</sub>N] using Sb<sub>2</sub>O<sub>3</sub> as catalyst.

**Table S1** The physical properties of phenylalkyl pyrrolidinium ILs

| Ionic liquid              | State        | $T_m$<br>(°C) | $T_d$<br>(°C) | Ionic liquid               | State            | $T_m$<br>(°C)    | $T_d$<br>(°C) |
|---------------------------|--------------|---------------|---------------|----------------------------|------------------|------------------|---------------|
| [2MBPy][PF <sub>6</sub> ] | White powder | 140           | 320           | [2MBPy][Tf <sub>2</sub> N] | White powder     | 79               | 340           |
| [3MBPy][PF <sub>6</sub> ] | White powder | 61            | 330           | [3MBPy][Tf <sub>2</sub> N] | White powder     | 35               | 350           |
| [4MBPy][PF <sub>6</sub> ] | White powder | 116           | 320           | [4MBPy][Tf <sub>2</sub> N] | Colorless liquid | -52 <sup>a</sup> | 360           |
| [2FBPy][PF <sub>6</sub> ] | White solid  | 197           | 340           | [2FBPy][Tf <sub>2</sub> N] | White solid      | 51               | 380           |
| [3FBPy][PF <sub>6</sub> ] | White powder | 97            | 320           | [3FBPy][Tf <sub>2</sub> N] | White solid      | 40               | 390           |
| [4FBPy][PF <sub>6</sub> ] | White powder | 121           | 320           | [4FBPy][Tf <sub>2</sub> N] | Colorless liquid | -58 <sup>a</sup> | 360           |
| [2NBPy][PF <sub>6</sub> ] | White powder | 179           | 290           | [2NBPy][Tf <sub>2</sub> N] | Grey white solid | 40               | 310           |
| [3NBPy][PF <sub>6</sub> ] | White powder | 190           | 310           | [3NBPy][Tf <sub>2</sub> N] | White powder     | 67               | 340           |
| [4NBPy][PF <sub>6</sub> ] | White powder | 150           | 300           | [4NBPy][Tf <sub>2</sub> N] | Yellow solid     | 50               | 320           |
| [PhEPy][PF <sub>6</sub> ] | White powder | 213           | 330           | [PhEPy][Tf <sub>2</sub> N] | White powder     | 52               | 400           |

<sup>a</sup> Glass transition temperature at the midpoint.

**Table S2.** Polycondensation of BHET with different amounts of ILs <sup>a</sup>

| Entry | IL                         | Catalyst             | IL<br>(wt%) | $M_w/10^4$<br>(g mol <sup>-1</sup> ) | PDI  | Yield<br>(%) |
|-------|----------------------------|----------------------|-------------|--------------------------------------|------|--------------|
| 1     | [4FBPy][Tf <sub>2</sub> N] | Sb(OAc) <sub>3</sub> | 80          | 2.34                                 | 1.51 | 88.0         |
| 2     | [4FBPy][Tf <sub>2</sub> N] | Sb(OAc) <sub>3</sub> | 50          | 1.90                                 | 2.09 | 73.0         |
| 3     | [4FBPy][Tf <sub>2</sub> N] | Sb(OAc) <sub>3</sub> | 30          | 1.52                                 | 2.57 | 85.0         |
| 4     | [4FBPy][Tf <sub>2</sub> N] | Sb(OAc) <sub>3</sub> | 20          | 1.15                                 | 2.30 | 84.0         |
| 5     | [4FBPy][Tf <sub>2</sub> N] | Sb(OAc) <sub>3</sub> | 5           | 0.76                                 | 2.22 | 77.9         |

<sup>a</sup> Polymerization conditions, see footnotes of Table 1.

**Table S3.** Polycondensation of BHET at different temperatures <sup>a</sup>

| Entry | IL                         | Catalyst | Temperature (°C) | $M_w/10^4$ (g mol <sup>-1</sup> ) | PDI  | Yield (%) |
|-------|----------------------------|----------|------------------|-----------------------------------|------|-----------|
| 1     | [4MBPy][Tf <sub>2</sub> N] | EGSb     | 240              | 1.03                              | 1.53 | 84.7      |
| 2     | [4MBPy][Tf <sub>2</sub> N] | EGSb     | 230              | 1.40                              | 2.07 | 78.8      |
| 3     | [4MBPy][Tf <sub>2</sub> N] | EGSb     | 220              | 1.10 <sup>b</sup>                 | 1.30 | 85.0      |
| 4     | [4MBPy][Tf <sub>2</sub> N] | EGSb     | 210              | 0.72 <sup>b</sup>                 | 1.73 | 68.0      |
| 5     | [4MBPy][Tf <sub>2</sub> N] | EGSb     | 200              | 0.60 <sup>b</sup>                 | 1.19 | 65.0      |
| 6     | [4MBPy][Tf <sub>2</sub> N] | EGSb     | 190              | 0.31 <sup>b</sup>                 | 1.58 | 65.0      |

<sup>a</sup> Polymerization conditions, see footnotes of Table 1. <sup>b</sup> Bimodal distribution.

**Table S4.** Water content of the samples <sup>a</sup>

| Sample                | IL <sup>b</sup> | IL <sup>c</sup> | BHET   | EGSb   | Sb(OAc) <sub>3</sub> | Mixture <sup>d</sup> | Mixture <sup>e</sup> |
|-----------------------|-----------------|-----------------|--------|--------|----------------------|----------------------|----------------------|
| H <sub>2</sub> O /wt% | 0.0282          | 0.0467          | 0.4363 | 1.3195 | 5.1850               | 0.4019               | 0.3559               |

<sup>a</sup> Samples are dried at 60 °C under vacuum. <sup>b</sup> [3MBPy][PF<sub>6</sub>]. <sup>c</sup> [3MBPy][Tf<sub>2</sub>N]. <sup>d</sup> PET/[3MBPy][Tf<sub>2</sub>N] prepared by polycondensation of BHET in [3MBPy][Tf<sub>2</sub>N] using EGSb as catalyst. <sup>e</sup> PET/[3MBPy][Tf<sub>2</sub>N] prepared by polycondensation of BHET in [3MBPy][Tf<sub>2</sub>N] using Sb(OAc)<sub>3</sub> as catalyst.
